# Supplementary material for: The influence of the acid source on the structural and anti-oxidation properties of ordered mesoporous carbons
Source: Royal Society of Chemistry journal article supplement (doi:10.1039/c3ra43055c), 2013-01-01
Supplement: c3ra43055c.pdf [file c3ra43055c.pdf]

# **The influence of the acid source on the structural and anti-oxidation properties of ordered mesoporous carbons**

**Keke Hou, Anfeng Zhang, Min Liu, Xinwen Guo\***

State Key Laboratory of Fine Chemicals and Department of Catalysis Chemistry and Engineering, School of Chemical Engineering, Dalian University of Technology,  
Dalian 116012, P R China

\*Corresponding author. Fax: 86 411 84986134;  
E-mail: [guoxw@dlut.edu.cn](mailto:guoxw@dlut.edu.cn) (X. W. Guo).

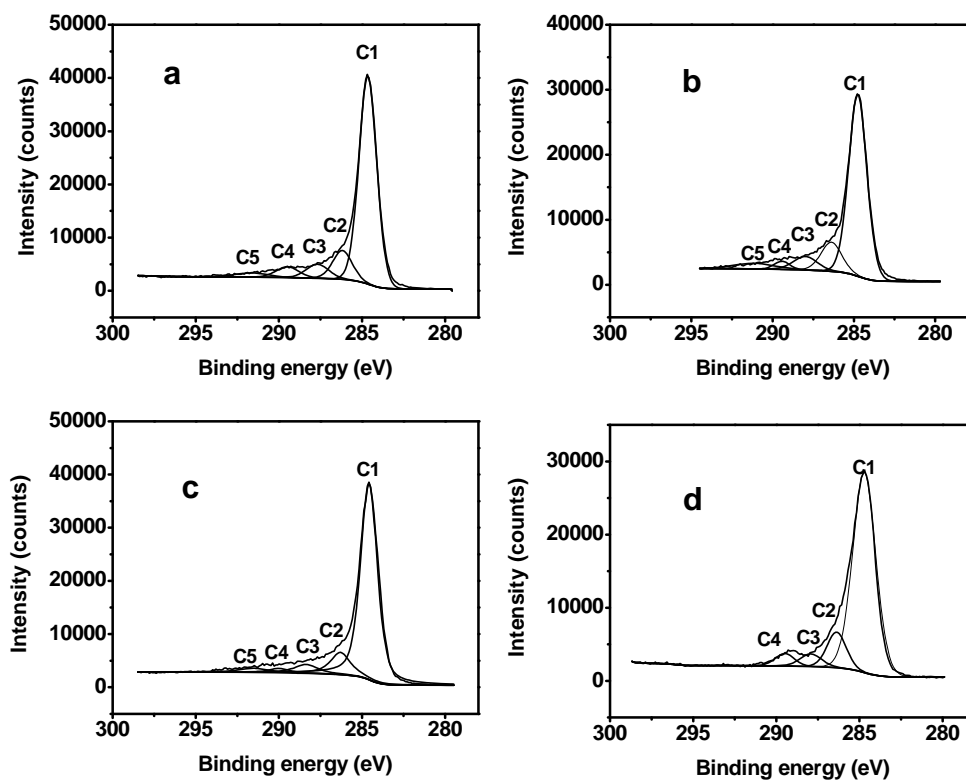

**Fig. 1S** XPS C1s high-resolution spectra of the non-oxidized samples: (a) OMC-HCl; (b) OMC-H<sub>3</sub>PO<sub>4</sub>; (c) OMC-HNO<sub>3</sub>; (d) OMC-H<sub>2</sub>SO<sub>4</sub>.

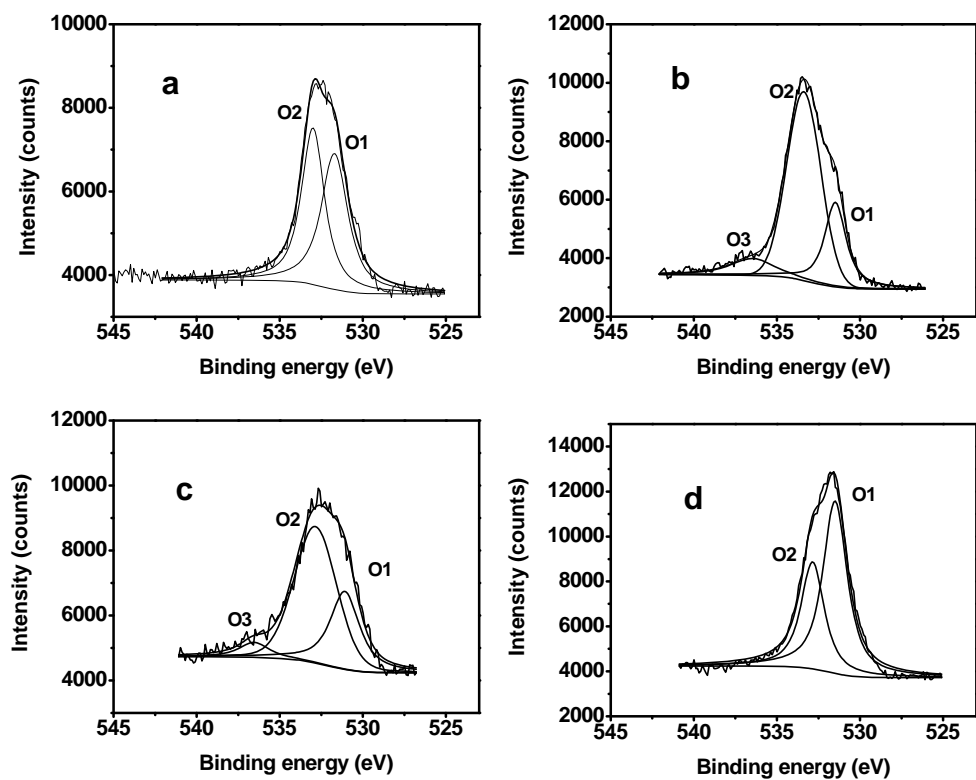

**Fig. 2S** XPS O1s high-resolution spectra of the non-oxidized samples: (a) O-OMC-HCl; (b) O-OMC-H<sub>3</sub>PO<sub>4</sub>; (c) O-OMC-HNO<sub>3</sub>; (d) O-OMC-H<sub>2</sub>SO<sub>4</sub>.

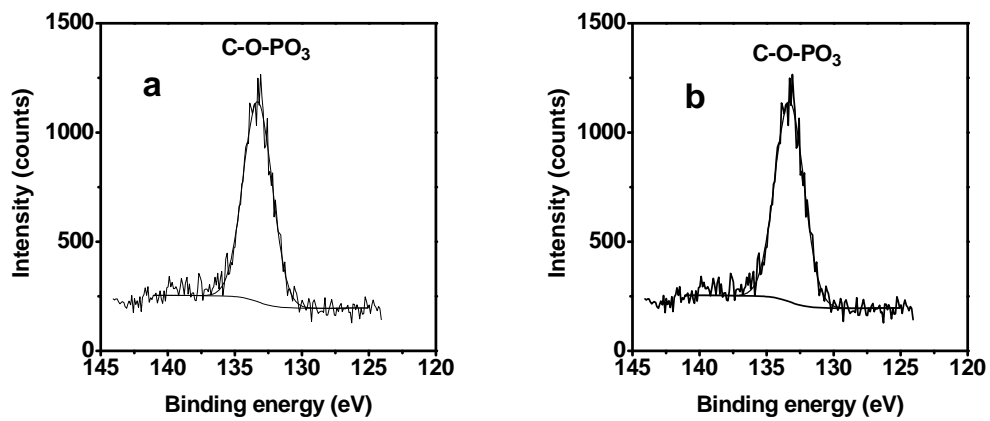

**Fig. 3S** XPS P2p high-resolution spectra of the samples: (a) OMC-H<sub>3</sub>PO<sub>4</sub>; (b) O-OMC-H<sub>3</sub>PO<sub>4</sub>.

Table S1. XPS assignments and elemental compositions for the samples prepared with different acid source and the corresponding oxidative samples.

| sample                               | C1s (eV)       |                |                |                          |                          | O1s (eV)                 |                          |                | Atom%<br>C:O:P   |
|--------------------------------------|----------------|----------------|----------------|--------------------------|--------------------------|--------------------------|--------------------------|----------------|------------------|
|                                      | Peak1<br>284.7 | Peak2<br>286.5 | Peak3<br>287.5 | Peak4<br>288.8–<br>289.1 | Peak5<br>291.5–<br>292.2 | Peak1<br>531.6–<br>531.9 | Peak2<br>533.0–<br>533.4 | Peak3<br>535.9 |                  |
| OMC-HCl                              | 68.8%          | 11.64%         | 8.24%          | 6.8%                     | 4.51%                    | 48.78%                   | 51.22%                   | -              | 92.51:7.49:0     |
| OMC-HNO <sub>3</sub>                 | 68.29%         | 13.45%         | 7.26%          | 6.11%                    | 4.89%                    | 27.83%                   | 61.31%                   | 10.86%         | 90.6:9.4:0       |
| OMC-H <sub>3</sub> PO <sub>4</sub>   | 72.06%         | 13.11%         | 7.08%          | 2.72%                    | 5.04%                    | 21.70%                   | 65.32%                   | 12.98%         | 82.93:13.8:3.27  |
| OMC-H <sub>2</sub> SO <sub>4</sub>   | 75.37%         | 9.71%          | 8.25%          | 6.66%                    | -                        | 61.29%                   | 38.71%                   | -              | 85.1:14.9:0      |
| O-OMC-HCl                            | 67.32%         | 14.3%          | -              | 15.55%                   | 2.82%                    | 41.25%                   | 58.75%                   | -              | 81.27:18.73:0    |
| O-OMC-HNO <sub>3</sub>               | 66.7%          | 16.71%         | -              | 13.02%                   | 3.58%                    | 63.48%                   | 36.52%                   | -              | 80.42:19.58:0    |
| O-OMC-H <sub>3</sub> PO <sub>4</sub> | 65.78%         | 12.69%         | 3.5%           | 16.57%                   | 1.45%                    | 64.25%                   | 35.75%                   | -              | 76.08:22.04:1.88 |
| O-OMC-H <sub>2</sub> SO <sub>4</sub> | 70.9%          | 12.57%         | 4.86%          | 9.73%                    | 1.94%                    | 73.48%                   | 26.52%                   | -              | 79.63:20.37:0    |

Table S2. The distributions of the surface oxygen-containing functional groups of the carbon nanostructures determined by Boehm titration

| sample                               | Carboxylic<br>(mmol/g) | Lactonic<br>(mmol/g) | Phenolic<br>(mmol/g) | acid groups<br>(mmol/g) |
|--------------------------------------|------------------------|----------------------|----------------------|-------------------------|
| OMC-HCl                              | 0.118                  | 0.208                | 0.253                | 0.579                   |
| OMC-HNO <sub>3</sub>                 | 0.129                  | 0.174                | 0.295                | 0.598                   |
| OMC-H <sub>3</sub> PO <sub>4</sub>   | 0.804                  | 0.149                | 0.264                | 1.217                   |
| OMC-H <sub>2</sub> SO <sub>4</sub>   | 0.093                  | 0.167                | 0.412                | 0.672                   |
| O-OMC-HCl                            | 0.647                  | 0.082                | 0.485                | 1.214                   |
| O-OMC-HNO <sub>3</sub>               | 0.712                  | 0.070                | 0.873                | 1.655                   |
| O-OMC-H <sub>3</sub> PO <sub>4</sub> | 1.241                  | 0.203                | 0.757                | 2.201                   |
| O-OMC-H <sub>2</sub> SO <sub>4</sub> | 0.290                  | 0.608                | 0.809                | 1.707                   |
